# Supplementary material for: Dimethyl-sulfoxide-assisted improvement in the crystallization of lead-acetate-based perovskites for high-performance solar cells
Source: Royal Society of Chemistry journal article supplement (doi:10.1039/c8tc01570h), 2018-01-01
Supplement: c8tc01570h1.pdf [file c8tc01570h1.pdf]

Supporting Information for

**Dimethyl-sulfoxide-assisted improvement in the  
crystallization of lead-acetate-based perovskite for  
high-performance solar cells**

Yawen Liu,<sup>a,b</sup> Zhihai Liu<sup>\*b,c</sup> and Eun-Cheol Lee<sup>\*a,b</sup>

<sup>a</sup>*Department of Nano-Physics, Gachon University, Gyeonggi 461-701, Republic of Korea. E-mail: ecllee@gachon.ac.kr*

<sup>b</sup>*Gachon Bio-Nano Research Institute, Gyeonggi 461-701, Republic of Korea*

<sup>c</sup>*Department of Bio-Nano Technology, Gachon University, Gyeonggi 461-701, Republic of Korea. \*E-mail: zhliu@gachon.ac.kr*

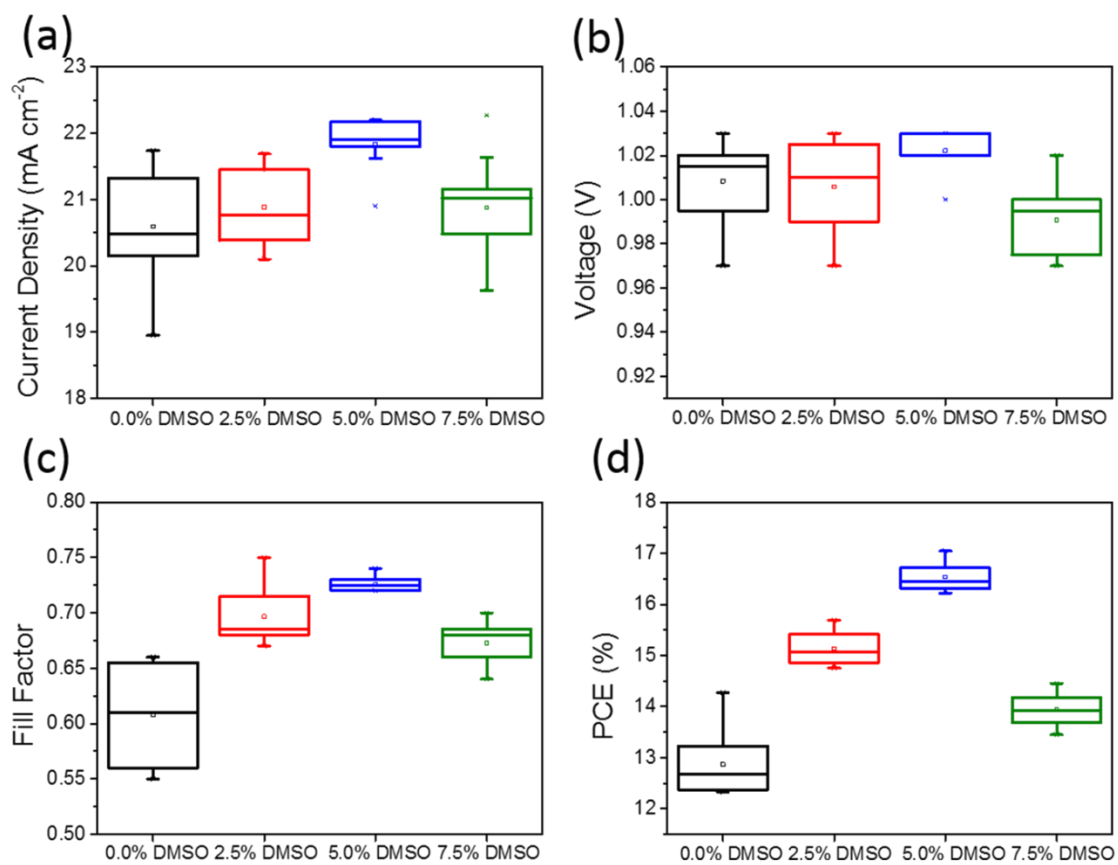

**Fig. S1.** Statistical photovoltaic parameters of (a)  $J_{sc}$ , (b)  $V_{sc}$ , (c) FF, and (d) PCE for PSCs based on perovskite films processed using precursors without (0.0%) and with 2.5, 5.0, and 7.5% DMSO as the solvent additive. The parameters were obtained under AM 1.5G (100 mW cm<sup>-2</sup>) at the scan rate of 0.1 V s<sup>-1</sup>.

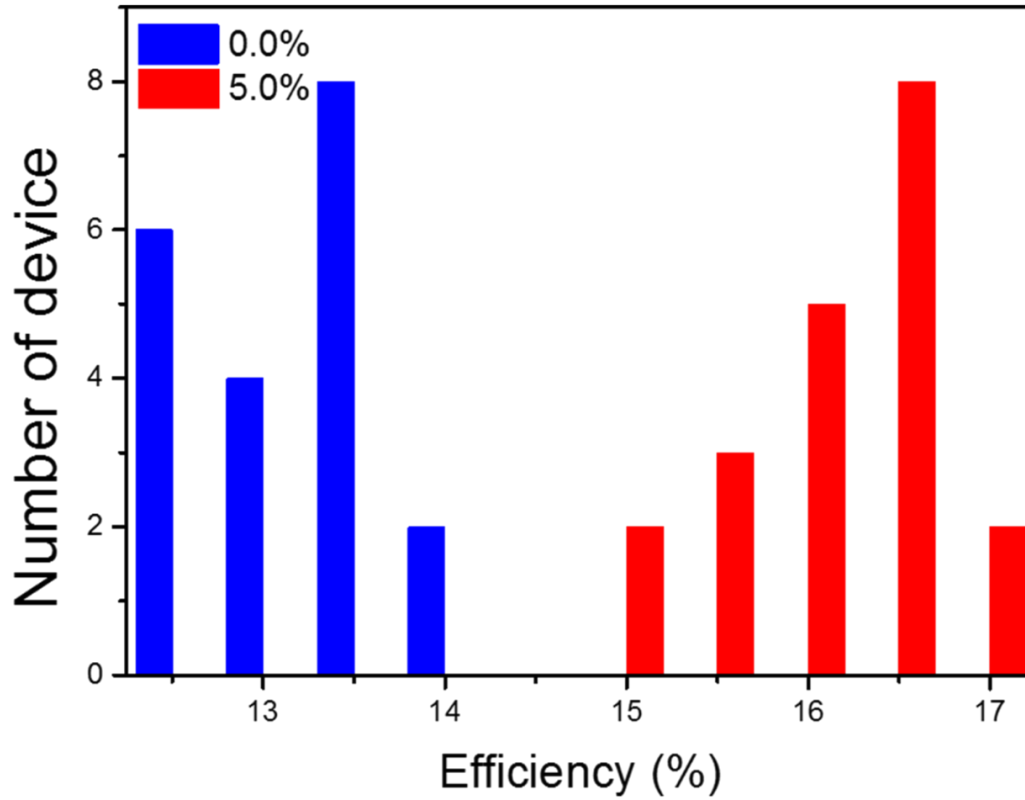

**Fig. S2.** Histogram of device parameters: PCE for two batches of PSCs based on perovskite films processed using precursors without (0.0%) and with 5.0% DMSO as the solvent additive.

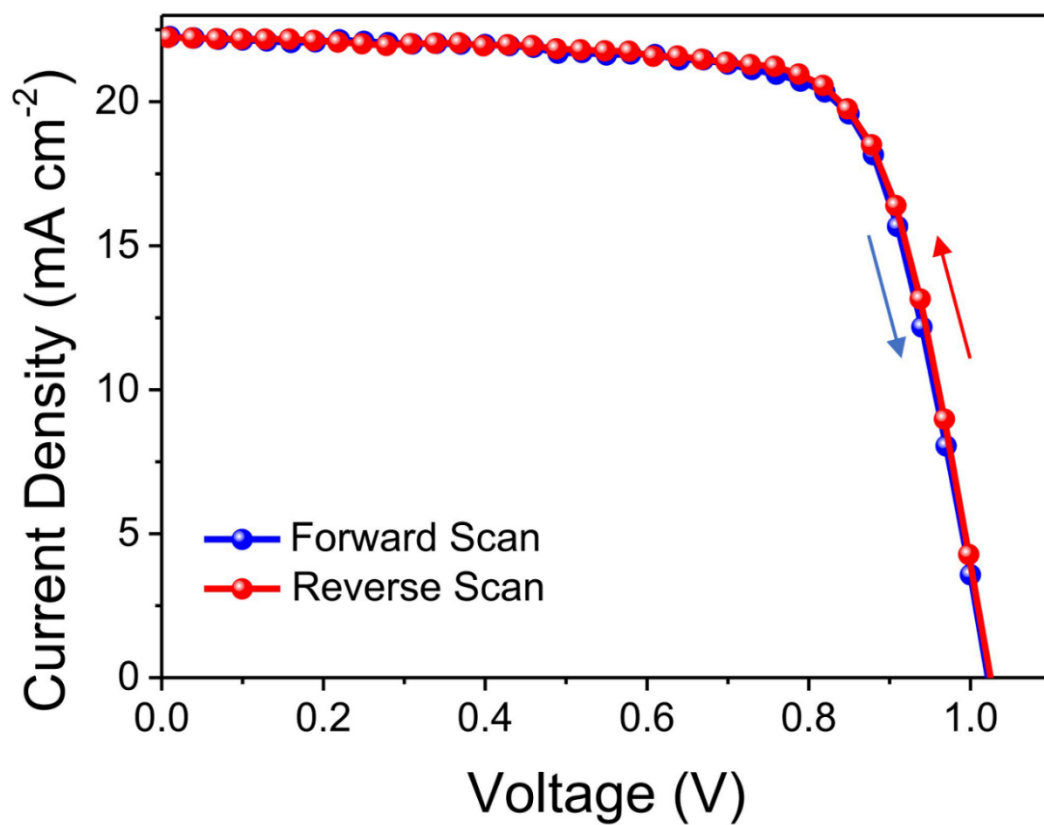

**Fig. S3.**  $J$ - $V$  characteristics under forward and reverse scans of the PSCs based on  $\text{CH}_3\text{NH}_3\text{PbI}_3$  processed using a precursor with 5.0% DMSO as the solvent additive.

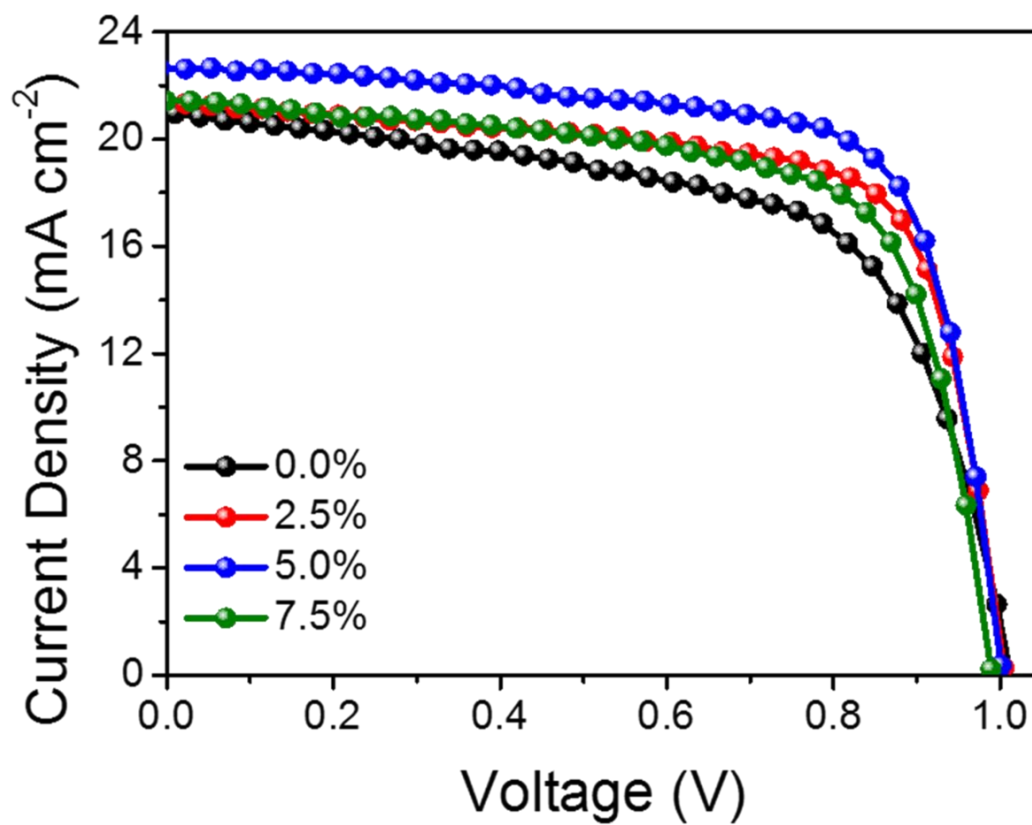

**Fig. S4.**  $J$ - $V$  characteristics of the PSCs without (0.0%) and with 2.5, 5.0, or 7.5% DMSO as the solvent additive under illumination of  $100 \text{ mW}\cdot\text{cm}^{-2}$  (AM 1.5G) and the effective device area was  $0.12 \text{ cm}^2$  ( $0.3 \text{ cm} \times 0.4 \text{ cm}$ ).

**Table S1.** Device parameters for PSCs based on perovskite films processed using precursors without (0.0%) and with 2.5, 5.0, and 7.5% DMSO as the solvent additive under illumination of  $100 \text{ mW}\cdot\text{cm}^{-2}$  (AM 1.5G) and the effective device area was  $0.12 \text{ cm}^2$  ( $0.3 \text{ cm} \times 0.4 \text{ cm}$ ).

| DMSO Concentration (vol. %) | $V_{oc}$ (V) | $J_{sc}$ ( $\text{mA cm}^{-2}$ ) | FF   | PCE (%) |
|-----------------------------|--------------|----------------------------------|------|---------|
| 0.0%                        | 1.01         | 20.85                            | 0.62 | 13.18   |
| 2.5%                        | 1.01         | 21.38                            | 0.71 | 15.38   |
| 5.0%                        | 1.01         | 22.18                            | 0.73 | 16.35   |
| 7.5%                        | 0.99         | 21.33                            | 0.67 | 14.13   |

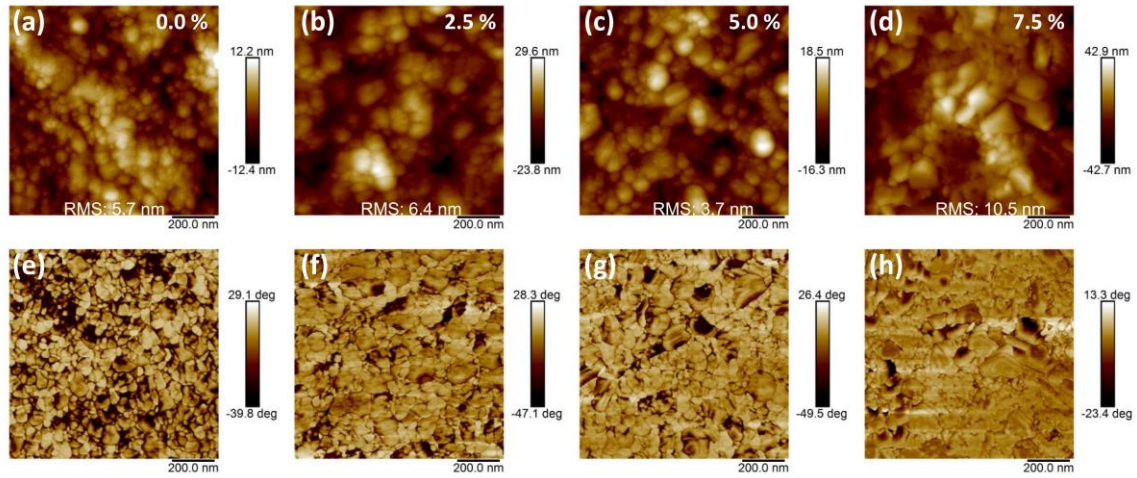

**Fig. S5.** AFM height and phase images of  $\text{CH}_3\text{NH}_3\text{PbI}_3$  perovskite films processed using precursors without (0.0%) and with 2.5, 5.0, and 7.5% DMSO as the solvent additive. (a)-(d) and (e)-(h) are the height and phase images, respectively.

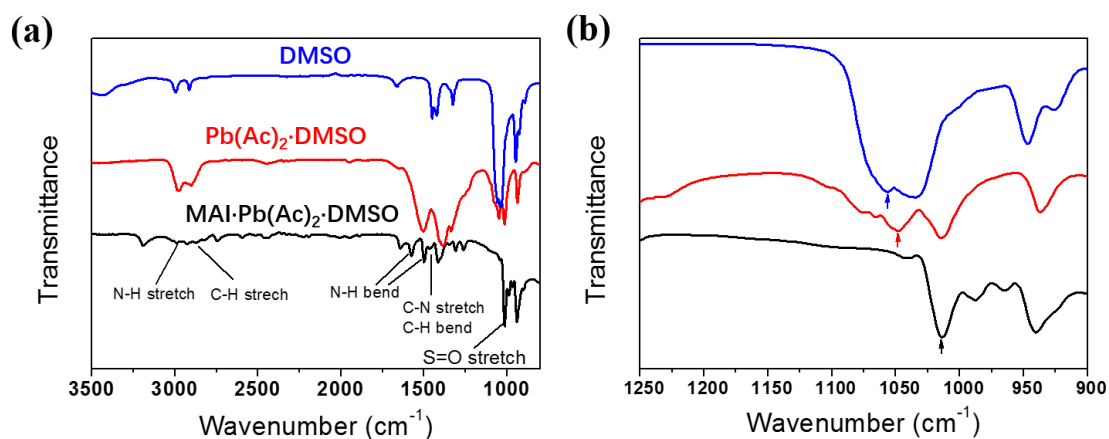

**Fig. S6.** (a) FTIR spectra of DMSO,  $\text{Pb}(\text{Ac})_2 \cdot \text{DMSO}$ , and  $\text{MAI} \cdot \text{Pb}(\text{Ac})_2 \cdot \text{DMSO}$  intermediate phase. (b) Magnified view for S=O stretching mode in the spectra.

**Table S2.** Stretching frequency of S=O in DMSO,  $\text{Pb}(\text{Ac})_2 \cdot \text{DMSO}$ , and  $\text{MAI} \cdot \text{Pb}(\text{Ac})_2 \cdot \text{DMSO}$ , along with their chemical structures.

| Material                            | $\text{DMSO}$ | $\text{Pb}(\text{Ac})_2 \leftarrow \text{DMSO}$ | $(\text{MA}^+) \text{I}^- \rightarrow \text{Pb}(\text{Ac})_2 \leftarrow \text{DMSO}$ |
|-------------------------------------|---------------|-------------------------------------------------|--------------------------------------------------------------------------------------|
|                                     | [DMSO]        | [ $\text{Pb}(\text{Ac})_2 \cdot \text{DMSO}$ ]  | [ $\text{MAI} \cdot \text{Pb}(\text{Ac})_2 \cdot \text{DMSO}$ ]                      |
| S=O wavenumber ( $\text{cm}^{-1}$ ) | 1058          | 1047                                            | 1013                                                                                 |

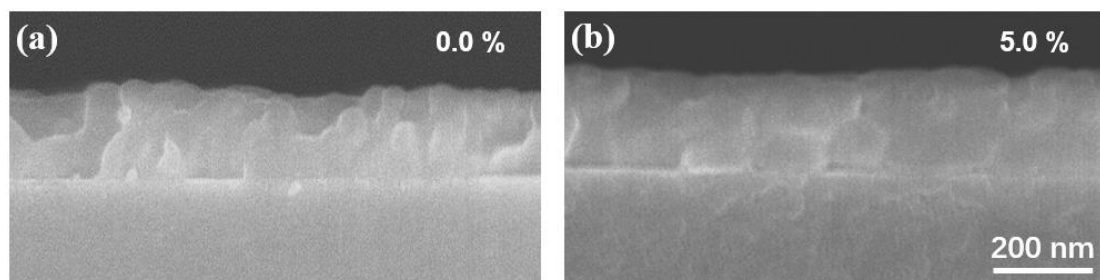

**Fig. S7.** Cross-sectional SEM images of the perovskite films prepared from precursors without (1.0%) and with 5.0% DMSO.

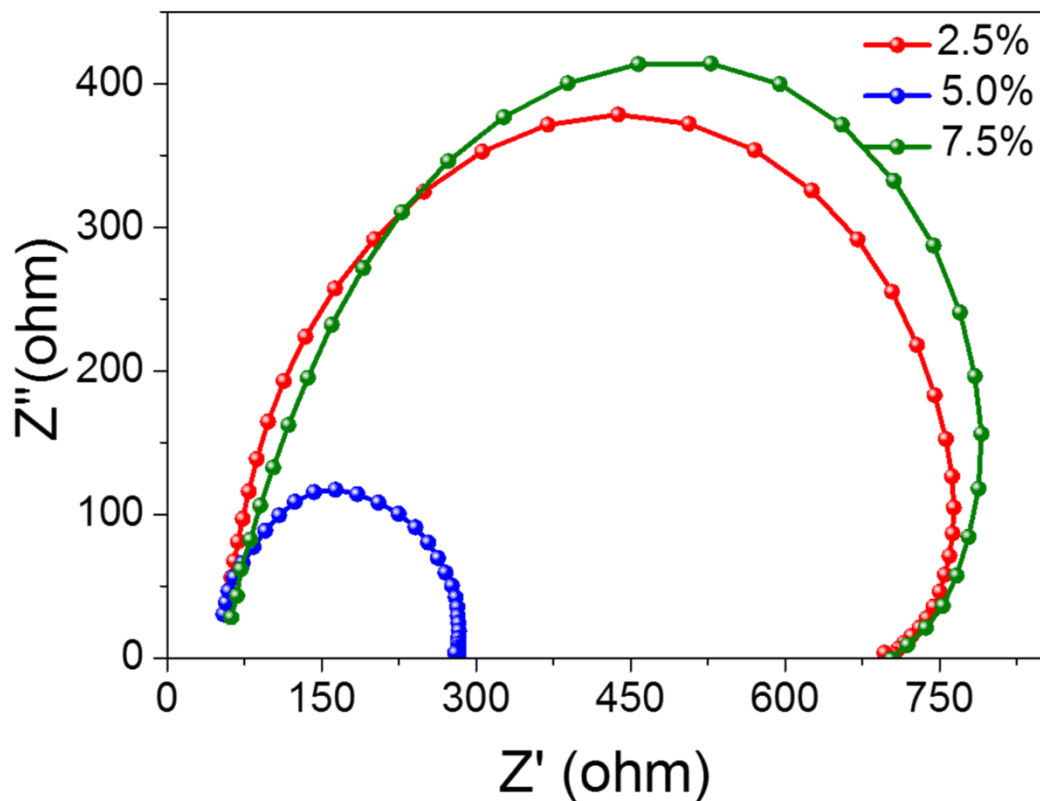

**Fig. S8.** Magnified Nyquist plots (under sun illumination with a bias of 1 V) for PSCs based on perovskite films processed using precursors with 2.5, 5.0, and 7.5% DMSO as the solvent additive.

**Table S3.** EIS parameters of planar heterojunction  $\text{CH}_3\text{NH}_3\text{PbI}_3$  perovskite solar cells fabricated using lead acetate with DMSO.

| DMSO Concentration (vol. %) | $R_s$ ( $\Omega$ ) | $R_{ct}$ ( $\Omega$ ) | $C_{ct}$ (F)         |
|-----------------------------|--------------------|-----------------------|----------------------|
| 0.0%                        | 36                 | 2981                  | $1.5 \times 10^{-8}$ |
| 2.5%                        | 31                 | 483                   | $5.3 \times 10^{-9}$ |
| 5.0%                        | 27                 | 217                   | $3.1 \times 10^{-9}$ |
| 7.5%                        | 32                 | 490                   | $5.8 \times 10^{-9}$ |
